# Supplementary material for: Towards a knowledge graph for pre-/probiotics and microbiota–gut–brain axis diseases
Source: PubMed Central journal article supplement (PMC9643397; doi:10.1038/s41598-022-21735-x), 2022-11-08
Supplement: 41598_2022_21735_MOESM1_ESM.pdf [file 41598_2022_21735_MOESM1_ESM.pdf]

# Towards a knowledge graph for pre-/probiotics and microbiota-gut-brain axis diseases

Ting Liu<sup>1,2</sup>, Gongjin Lan<sup>3</sup>, K. Anton Feenstra<sup>1</sup>, Zhisheng Huang<sup>2</sup>, and Jaap Heringa<sup>1,\*</sup>

<sup>1</sup>Center for Integrative Bioinformatics, Department of Computer Science, Vrije Universiteit Amsterdam, 1081 HV, Amsterdam, The Netherlands

<sup>2</sup>Knowledge Representation and Reasoning Group, Department of Computer Science, Vrije Universiteit Amsterdam, 1081 HV, Amsterdam, The Netherlands

<sup>3</sup>Department of Computer Science and Engineering, Southern University of Science and Technology, 518055, Shenzhen, China

\*[j.heringa@vu.nl](mailto:j.heringa@vu.nl)

## SPARQL protocols for query cases

SI Listing 1: The SPARQL protocol for query case 1: retrieve the health effects of *B. bifidum* treatment

SI Listing 2: The SPARQL protocol for query case 2: retrieve all probiotics that impact sleep conditions

SI Listing 3: The SPARQL protocol for query case 3: retrieve probiotics that affect BDNF gene expression

SI Listing 4: The SPARQL protocol for query case 4: retrieve all probiotics that impact depressive disorder

**SI Listing 1.** The SPARQL protocol for query case 1: retrieve the health effects of *B. bifidum* treatment

```
1  prefix rdf: <http://www.w3.org/1999/02/22-rdf-syntax-ns#>
2  prefix owl: <http://www.w3.org/2002/07/owl#>
3  prefix rdfs: <http://www.w3.org/2000/01/rdf-schema#>
4  prefix ppconcept: <http://wasp.cs.vu.nl/ppconcept#>
5  prefix ppstatement: <http://wasp.cs.vu.nl/ppstatement#>
6
7  select distinct ?pmid ?probiotics ?species ?population ?regulate ?effect
8
9  where {
10     {?statement  ppstatement:hasProbiotics  ppstatement:Bifidobacterium_bifidum ;
11                ppstatement:hasSpecies      ?species ;
12                ppstatement:hasPopulation   ?population ;
13                ppstatement:hasRegulation   ?regulate ;
14                ppstatement:hasEffectOn    ?effect ;
15                ppstatement:hasReference    ?reference .
16     ?reference  ppstatement:hasPMID        ?pmid .}
17  union
18     {?statement  ppstatement:hasProbiotics  ?probiotics ;
19                ppstatement:hasSpecies      ?species ;
20                ppstatement:hasPopulation   ?population ;
21                ppstatement:hasRegulation   ?regulate ;
22                ppstatement:hasEffectOn    ?effect ;
23                ppstatement:hasReference    ?reference .
24     ?reference  ppstatement:hasPMID        ?pmid .
25     ?probiotics rdfs:subClassOf            ppstatement:Bifidobacterium_bifidum .}
26  union
27     {?statement  ppstatement:hasProbiotics  ?probiotics ;
28                ppstatement:hasSpecies      ?species ;
29                ppstatement:hasPopulation   ?population ;
30                ppstatement:hasRegulation   ?regulate ;
31                ppstatement:hasEffectOn    ?effect ;
32                ppstatement:hasReference    ?reference .
33     ?reference  ppstatement:hasPMID        ?pmid .
34     ?probiotics a                          owl:Class ;
35                owl:intersectionOf      ?mixture .
36     ?mixture    rdf:rest*/rdf:first      ?composition .
37     ?mixture    rdf:rest*/rdf:first      ppstatement:Bifidobacterium_bifidum .}
38  union
39     {?statement  ppstatement:hasProbiotics  ?probiotics ;
40                ppstatement:hasSpecies      ?species ;
41                ppstatement:hasPopulation   ?population ;
42                ppstatement:hasRegulation   ?regulate ;
43                ppstatement:hasEffectOn    ?effect ;
44                ppstatement:hasReference    ?reference .
45     ?reference  ppstatement:hasPMID        ?pmid .
46     ?probiotics a                          owl:Class ;
47                owl:intersectionOf      ?mixture .
48     ?mixture    rdf:rest*/rdf:first      ?composition .
49     ?composition rdfs:subClassOf        ppstatement:Bifidobacterium_bifidum .}
50 }
```

## SI Listing 2. The SPARQL protocol for query case 2: retrieve all probiotics that impact sleep conditions

```
1 prefix rdf: <http://www.w3.org/1999/02/22-rdf-syntax-ns#>
2 prefix owl: <http://www.w3.org/2002/07/owl#>
3 prefix rdfs: <http://www.w3.org/2000/01/rdf-schema#>
4 prefix snomed: <http://wasp.cs.vu.nl/sct/sct#>
5 prefix ppconcept: <http://wasp.cs.vu.nl/ppconcept#>
6 prefix ppstatement: <http://wasp.cs.vu.nl/ppstatement#>
7
8 select distinct ?pmid ?text1
9
10 where {
11     ?url1      rdfs:subClassOf      <http://www.ihtsdo.org/SCT_106168000> .
12     ?url1      snomed:hasEnglishLabel  ?urlLabel1 .
13     ?sense1    ppconcept:SenseURL      ?url1 .
14     ?senses1   ppconcept:hasSense      ?sense1 .
15     ?term1     ppconcept:hasSenses     ?senses1 .
16     ?annot1    ppconcept:hasLabel      ?termLabel1 .
17     ?annot1    ppconcept:hasTerm       ?term1 .
18     ?annos1    ppconcept:hasAnnotation ?annot1 .
19     ?annos1    ppconcept:hasSource     ?source1 .
20     ?annos1    ppconcept:hasText       ?text1 .
21     ?pmid      ppconcept:hasAnnotations ?annos1 .
22     ?pmid      ppconcept:hasAnnotations ?annos2 .
23     ?annos2    ppconcept:hasText       ?text2 .
24     ?annos2    ppconcept:hasSource     ?source2 .
25     ?annos2    ppconcept:hasAnnotation ?annot2 .
26     ?annot2    ppconcept:hasTerm       ?term2 .
27     ?annot2    ppconcept:hasLabel      ?termLabel2 .
28     ?term2     ppconcept:hasSenses     ?senses2 .
29     ?senses2   ppconcept:hasSense     ?sense2 .
30     ?sense2    ppconcept:SenseURL      ?url2 .
31     ?url2      snomed:hasEnglishLabel  ?urlLabel2 .
32     ?url2      rdfs:subClassOf      <http://www.ihtsdo.org/SCT_264395009> .}
33 order by asc (?pmid)
```

### SI Listing 3. The SPARQL protocol for query case 3: retrieve probiotics that affect BDNF gene expression

```
1 prefix rdf: <http://www.w3.org/1999/02/22-rdf-syntax-ns#>
2 prefix owl: <http://www.w3.org/2002/07/owl#>
3 prefix rdfs: <http://www.w3.org/2000/01/rdf-schema#>
4 prefix snomed: <http://wasp.cs.vu.nl/sct/sct#>
5 prefix ppconcept: <http://wasp.cs.vu.nl/ppconcept#>
6 prefix ppstatement: <http://wasp.cs.vu.nl/ppstatement#>
7
8 select distinct ?pmid ?probiotics ?composition ?url ?text1 ?urlLabel1
9
10 where {
11     {?statement      ppstatement:hasEffectOn      ?effect .
12     ?statement      ppstatement:hasProbiotics     ?probiotics .
13     ?statement      ppstatement:hasSpecies       ?species .
14     ?statement      ppstatement:hasReference     ?reference .
15     ?reference       ppstatement:hasPMID         ?pmid .
16     ?probiotics     owl:sameAs                 ?url .
17     filter regex    (?effect,"bdnf","i")}
18 Union
19     {?statement      ppstatement:hasEffectOn      ?effect .
20     ?statement      ppstatement:hasProbiotics     ?probiotics .
21     ?statement      ppstatement:hasSpecies       ?species .
22     ?statement      ppstatement:hasReference     ?reference .
23     ?reference       ppstatement:hasPMID         ?pmid .
24     ?probiotics     a                            owl:Class ;
25     ?mixture         owl:intersectionOf        ?mixture .
26     ?composition    rdf:rest*/rdf:first         ?composition .
27     ?composition    owl:sameAs                 ?url .
28     filter regex    (?effect,"bdnf","i")}
29 union
30     {?url1          rdfs:subClassOf              <http://www.ihtsdo.org/SCT_264395009> .
31     ?url1          snomed:hasEnglishLabel       ?urlLabel1 .
32     ?sense1        ppconcept:SenseURL          ?url1 .
33     ?senses1       ppconcept:hasSense          ?sense1 .
34     ?term1         ppconcept:hasSenses         ?senses1 .
35     ?annot1        ppconcept:hasLabel          ?termLabel1 .
36     ?annot1        ppconcept:hasTerm          ?term1 .
37     ?annos1        ppconcept:hasAnnotation     ?annot1 .
38     ?annos1        ppconcept:hasSource        ?source1 .
39     ?annos1        ppconcept:hasText          ?text1 .
40     ?pmid          ppconcept:hasAnnotations    ?annos1 .
41     filter regex    (?text1,"bdnf","i")}
42 }
```

#### SI Listing 4. TheSPARQL protocol for query case 4: retrieve all probiotics that impact depressive disorder

```

1  prefix rdf: <http://www.w3.org/1999/02/22-rdf-syntax-ns#>
2  prefix owl: <http://www.w3.org/2002/07/owl#>
3  prefix rdfs: <http://www.w3.org/2000/01/rdf-schema#>
4  prefix snomed: <http://wasp.cs.vu.nl/sct/sct#>
5  prefix ppconcept: <http://wasp.cs.vu.nl/ppconcept#>
6  prefix ppstatement: <http://wasp.cs.vu.nl/ppstatement#>
7
8  select distinct ?pmid ?probiotics ?regulate ?effect ?composition ?text1 ?text2
9
10 where {
11     {?statement      ppstatement:hasPopulation  ppstatement:Depressive_disorder ;
12                    ppstatement:hasSpecies      ?species ;
13                    ppstatement:hasProbiotics    ?probiotics ;
14                    ppstatement:hasRegulation    ?regulate ;
15                    ppstatement:hasEffectOn      ?effect ;
16                    ppstatement:hasReference     ?reference .
17     ?reference      ppstatement:hasPMID        ?pmid .}
18 union
19     {?statement      ppstatement:hasPopulation  ppstatement:Depressive_disorder ;
20                    ppstatement:hasSpecies      ?species ;
21                    ppstatement:hasProbiotics    ?probiotics ;
22                    ppstatement:hasRegulation    ?regulate ;
23                    ppstatement:hasEffectOn      ?effect ;
24                    ppstatement:hasReference     ?reference .
25     ?reference      ppstatement:hasPMID        ?pmid .
26     ?probiotics     a                          owl:Class ;
27                    owl:intersectionOf      ?mixture .
28     ?mixture        rdf:rest*/rdf:first      ?composition .}
29 union
30     {?url1          rdfs:subClassOf           <http://www.ihtsdo.org/SCT_264395009> .
31     ?url1          snomed:hasEnglishLabel    ?urlLabel1 .
32     ?sense1        ppconcept:SenseURL       ?url1 .
33     ?senses1       ppconcept:hasSense       ?sense1 .
34     ?term1         ppconcept:hasSenses      ?senses1 .
35     ?annot1        ppconcept:hasLabel       ?termLabel1 .
36     ?annot1        ppconcept:hasTerm       ?term1 .
37     ?annos1        ppconcept:hasAnnotation  ?annot1 .
38     ?annos1        ppconcept:hasSource      ?source1 .
39     ?annos1        ppconcept:hasText       ?text1 .
40     ?pmid          ppconcept:hasAnnotations ?annos1 .
41     filter regex   (?text1,"depress","i")}
42 union
43     {?sense2        ppconcept:SenseURL       ?url2 .
44     ?senses2       ppconcept:hasSense       ?sense2 .
45     ?term2         ppconcept:hasSenses      ?senses2 .
46     ?annot2        ppconcept:hasLabel       ?termLabel2 .
47     ?annot2        ppconcept:hasTerm       ?term2 .
48     ?annos2        ppconcept:hasAnnotation  ?annot2 .
49     ?annos2        ppconcept:hasSource      ?source2 .
50     ?annos2        ppconcept:hasText       ?text2 .
51     ?pmid          ppconcept:hasAnnotations ?annos2 .
52     filter regex   (?text2,"depress","i")
53     filter regex   (?text2,"probiotic","i")}
54 }

```
